# Supplementary figures and images for: A 50% n-octylmethyl, 50% diphenyl-polysiloxane as stationary phase with unique selectivity for gas chromatography
Source: Royal Society of Chemistry journal article supplement (doi:10.1039/b309476f), 2003-01-01

This journal is © The Royal Society of Chemistry 2003


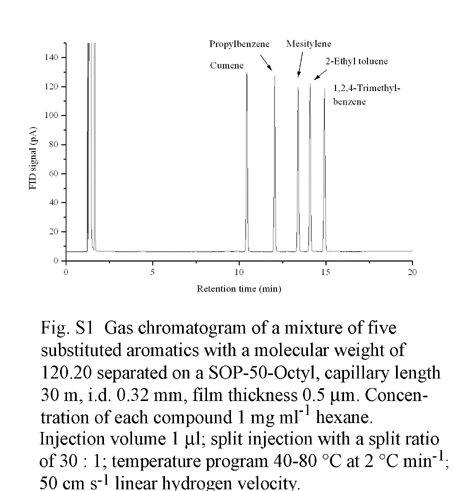

Supplement: b309476f.doc [file b309476f.doc]
